# Supplementary material for: Catalytic synthesis of polyethylene-block-polynorbornene copolymers using a living polymerization nickel catalyst
Source: Royal Society of Chemistry journal article supplement (doi:10.1039/c4py00701h), 2014-01-01
Supplement: c4py00701h1.pdf [file c4py00701h1.pdf]

# Supporting Information

## **Catalytic Synthesis of Polyethylene-*block*-Polynorbornene Copolymers Using a Living Polymerization Nickel Catalyst**

Haiyang Gao\*, Yong Liu, Guiliang Li, Zefan Xiao, Guodong Liang, and Qing Wu

PCFM Lab, DSAPM Lab, School of Chemistry and Chemical Engineering, Sun Yat-Sen University, Guangzhou 510275, China.

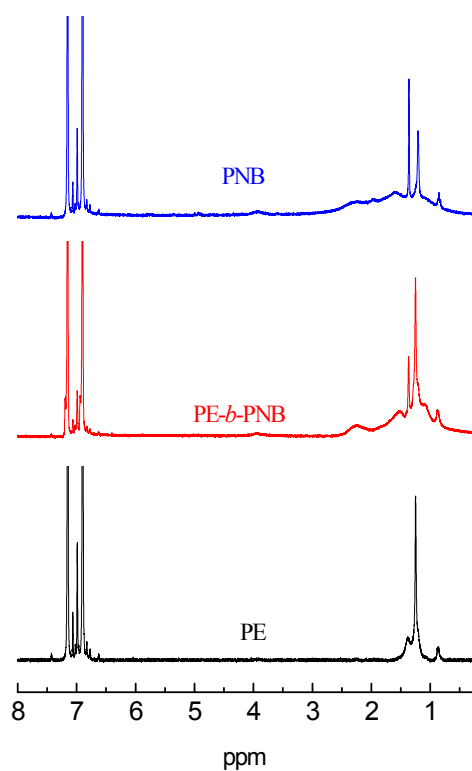

**Figure S1**  $^1\text{H}$  NMR spectra of the PNB, PE, and PE-*b*-PNB block copolymer.

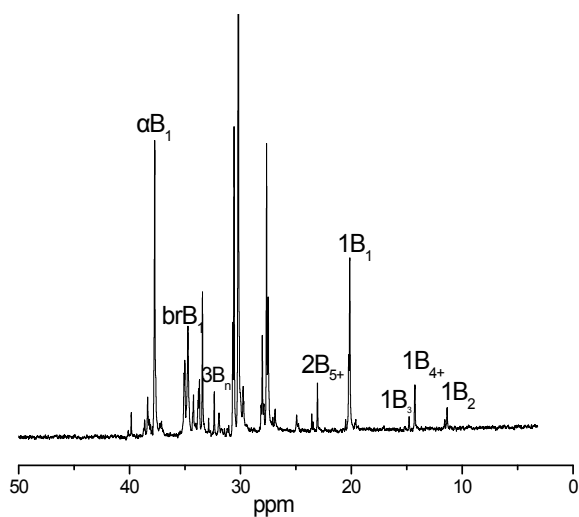

**Figure S2**  $^{13}\text{C}$  NMR spectrum of the PE produced by **1**/MMAO.

**Table S1** Branching distribution of the PE produced by **1**/MMAO.<sup>1,2</sup>

| run | catalyst       | T(°C) | Branched chain (/1000C) |    |    |    |    |    | Branches (/1000C) |
|-----|----------------|-------|-------------------------|----|----|----|----|----|-------------------|
|     |                |       | Me                      | Et | Pr | Bu | Pe | Lg |                   |
| 8   | <b>1</b> /MMAO | -20   | 25                      | 3  | 1  | 4  | 0  | 6  | 39                |

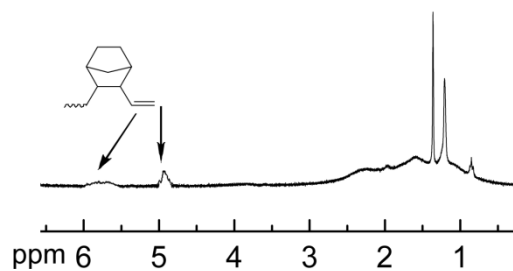

**Figure S3**  $^1\text{H}$  NMR spectrum of the polymer product generated from norbornene polymerization using nickel catalyst **1** in the presence of ethylene

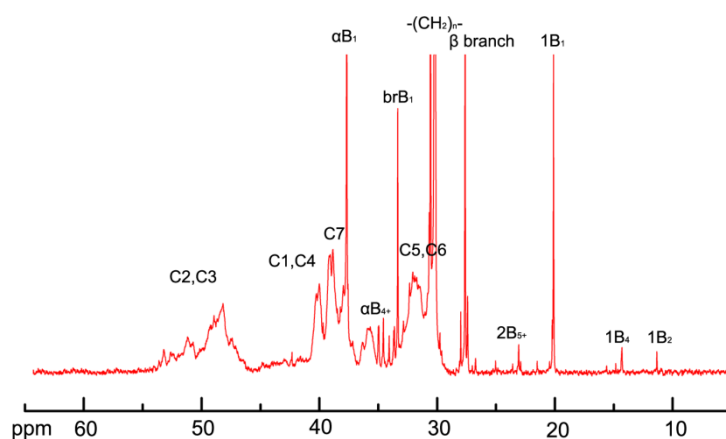

**Figure S4**  $^{13}\text{C}$  NMR spectrum of the PE-*b*-PNB produced by **1**/MMAO.

**Table S2** Assignments of the peaks in the  $^{13}\text{C}$  NMR spectrum of the PE-*b*-PNB.

| Assignment           | Chem. Shift (ppm) |
|----------------------|-------------------|
| 1B <sub>2</sub>      | 11.2              |
| 1B <sub>4+</sub>     | 14.2              |
| 1B <sub>1</sub>      | 20.0              |
| 2B <sub>5+</sub>     | 22.9              |
| β branch             | 27.40-27.8        |
| -(CH <sub>2</sub> )- | 30.0              |
| C5,C6 of PNB         | 29.4-33.0         |
| brB <sub>1</sub>     | 33.2              |
| αB <sub>4+</sub>     | 34.4              |
| C7 of PNB            | 35.5~38.5         |
| αB <sub>1</sub>      | 37.5              |
| C1,C4 of PNB         | 38.8~42.8         |
| C2,C3 of PNB         | 46.1~54.0         |

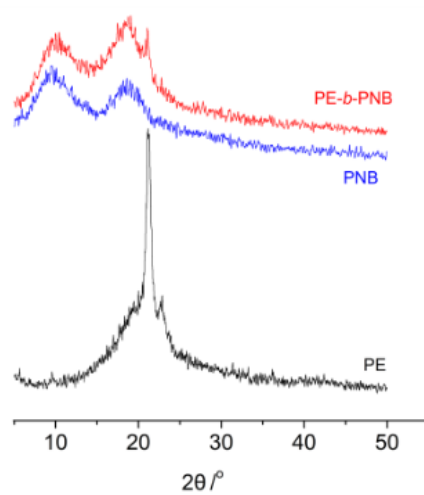

**Figure S5** WAXD curves of the PNB, PE, and PE-*b*-PNB block copolymer.

**References:**

- (1) L. K. Johnson, C. M. Killian, M. Brookhart, *J. Am. Chem. Soc.* **1995**, *117*, 6414-6415.
- (2) Galland, G. B.; de Souza, R. F.; Mauler, R. S.; Nunes, F. F. *Macromolecules* **1999**, *32*, 1620-1625.
